# Supplementary material for: A C2-symmetric antimonato polyoxovanadate cluster [V16Sb4O42(H2O)]8− derived from the {V18O42} archetype
Source: Royal Society of Chemistry journal article supplement (doi:10.1039/c2dt30319a), 2012-01-01
Supplement: c2dt30319a.pdf [file c2dt30319a.pdf]

# A $C_2$ -symmetric Antimonato Polyoxovanadate Cluster $[V_{16}Sb_4O_{42}(H_2O)]^{8-}$ derived from the $\{V_{18}O_{42}\}$ archetype

Elena Antonova,<sup>a</sup> Christian Näther,<sup>a</sup> Paul Kögerler<sup>b</sup> and Wolfgang Bensch<sup>a,\*</sup>

Supplementary Information

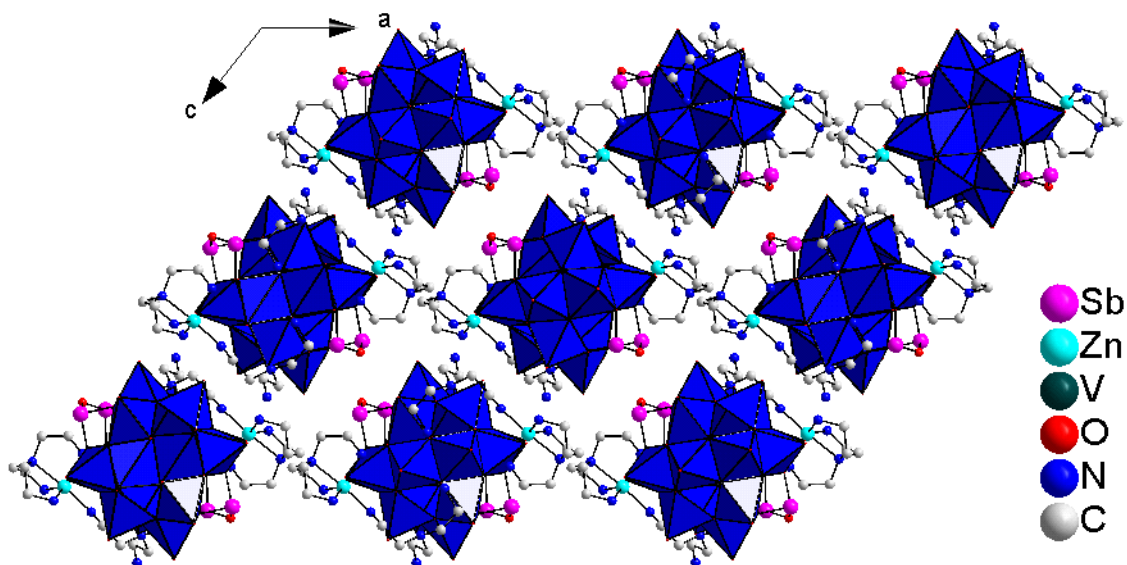

**Fig. S1** Representation of the clusters in compound **1** in the  $ac$  plane. H atoms are not shown.

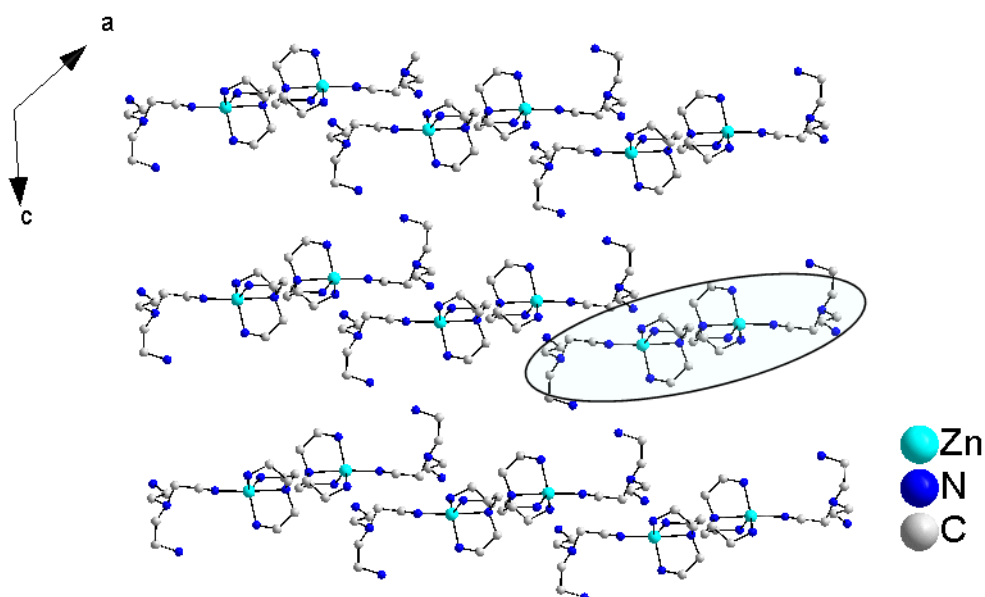

**Fig. S2** The  $Zn(tren)_2$  complexes in the structure of **1** in the  $(010)$  plane. A pair of *anti*-oriented neighboring complexes is encircled. H atoms omitted for clarity.

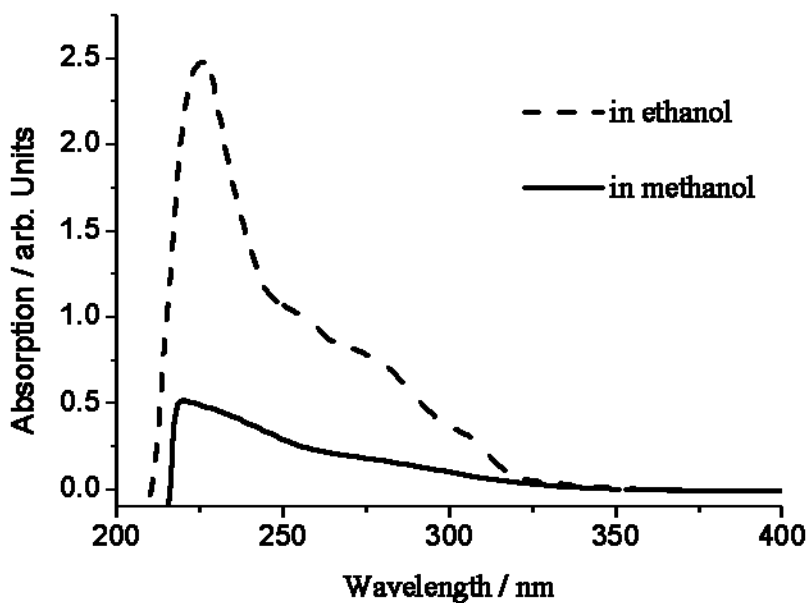

Fig. S3 UV spectra of compound 1 in ethanol and methanol.

**Table S1** Bond lengths [ $\text{\AA}$ ] for  $\{(\text{trenH}_2)\text{Zn}(\text{tren})\}_2[\text{V}_{16}\text{Sb}_4\text{O}_{42}(\text{H}_2\text{O})] \cdot x\text{H}_2\text{O}$  ( $x = 6-10$ ).

|             |            |             |           |
|-------------|------------|-------------|-----------|
| Sb(1)-O(18) | 1.952(4)   | N(6)-C(11)  | 1.463(7)  |
| Sb(1)-O(10) | 1.960(4)   | N(6)-C(10)  | 1.468(8)  |
| Sb(1)-O(19) | 1.966(4)   | N(6)-C(8)   | 1.478(8)  |
| Sb(2)-O(10) | 1.947(4)   | N(4)-C(4)   | 1.473(9)  |
| Sb(2)-O(4)  | 1.948(4)   | N(4)-C(2)   | 1.476(9)  |
| Sb(2)-O(5)  | 1.952(4)   | N(4)-C(6)   | 1.484(9)  |
| V(1)-V(7)   | 2.9458(13) | N(8)-C(12)  | 1.483(8)  |
| V(1)-V(6)   | 2.9472(13) | C(2)-C(1)   | 1.533(11) |
| V(2)-V(8)   | 2.9927(13) | C(6)-C(3)   | 1.520(9)  |
| V(2)-V(6)   | 3.0417(13) | N(3)-C(3)   | 1.481(8)  |
| V(3)-V(4)   | 2.9631(13) | N(2)-C(5)   | 1.490(8)  |
| V(3)-V(6)   | 3.0064(12) | N(5)-C(7)   | 1.483(8)  |
| V(4)-V(4)#1 | 2.729(2)   | N(1)-C(1)   | 1.470(10) |
| V(4)-V(5)   | 3.1013(13) | C(10)-C(9)  | 1.511(10) |
| V(5)-V(7)   | 3.0704(13) | N(7)-C(9)   | 1.500(9)  |
| V(7)-V(8)#1 | 2.9293(13) | C(12)-C(11) | 1.531(8)  |
| V(8)-V(7)#1 | 2.9293(13) | C(8)-C(7)   | 1.513(8)  |
| V(8)-V(8)#1 | 2.9668(19) | C(5)-C(4)   | 1.530(11) |

Symmetry transformations used to generate equivalent atoms: #1  $-x, y, -z+1/2$

**Table S2** Angles [°] for  $\{(\text{trenH}_2)\text{Zn}(\text{tren})\}_2[\text{V}_{16}\text{Sb}_4\text{O}_{42}(\text{H}_2\text{O})] \cdot x\text{H}_2\text{O}$  ( $x = 6-10$ ).

|                   |            |                   |            |
|-------------------|------------|-------------------|------------|
| O(18)-Sb(1)-O(10) | 96.36(17)  | O(12)-V(2)-O(18)  | 78.02(16)  |
| O(18)-Sb(1)-O(19) | 93.74(17)  | O(2)-V(2)-O(18)   | 148.24(17) |
| O(10)-Sb(1)-O(19) | 97.20(17)  | O(8)-V(2)-O(18)   | 88.69(17)  |
| O(10)-Sb(2)-O(4)  | 94.32(17)  | O(13)-V(2)-V(8)   | 112.27(16) |
| O(10)-Sb(2)-O(5)  | 98.22(17)  | O(12)-V(2)-V(8)   | 122.48(12) |
| O(4)-Sb(2)-O(5)   | 96.59(18)  | O(2)-V(2)-V(8)    | 39.55(12)  |
| O(14)-V(1)-O(17)  | 104.6(2)   | O(8)-V(2)-V(8)    | 41.10(11)  |
| O(14)-V(1)-O(3)   | 109.3(2)   | O(18)-V(2)-V(8)   | 123.90(13) |
| O(17)-V(1)-O(3)   | 146.05(19) | O(13)-V(2)-V(6)   | 111.42(16) |
| O(14)-V(1)-O(11)  | 110.3(2)   | O(12)-V(2)-V(6)   | 38.42(11)  |
| O(17)-V(1)-O(11)  | 90.11(17)  | O(2)-V(2)-V(6)    | 125.16(13) |
| O(3)-V(1)-O(11)   | 80.09(16)  | O(8)-V(2)-V(6)    | 120.83(12) |
| O(14)-V(1)-O(12)  | 104.72(19) | O(18)-V(2)-V(6)   | 39.65(12)  |
| O(17)-V(1)-O(12)  | 80.10(16)  | V(8)-V(2)-V(6)    | 136.29(4)  |
| O(3)-V(1)-O(12)   | 89.49(16)  | O(9)-V(3)-O(17)   | 108.2(2)   |
| O(11)-V(1)-O(12)  | 144.99(18) | O(9)-V(3)-O(6)    | 107.8(2)   |
| O(14)-V(1)-V(7)   | 112.62(16) | O(17)-V(3)-O(6)   | 93.28(17)  |
| O(17)-V(1)-V(7)   | 125.23(13) | O(9)-V(3)-O(1)    | 110.6(2)   |
| O(3)-V(1)-V(7)    | 40.08(11)  | O(17)-V(3)-O(1)   | 140.85(18) |
| O(11)-V(1)-V(7)   | 40.27(12)  | O(6)-V(3)-O(1)    | 79.93(17)  |
| O(12)-V(1)-V(7)   | 124.18(12) | O(9)-V(3)-O(4)    | 107.9(2)   |
| O(14)-V(1)-V(6)   | 104.00(16) | O(17)-V(3)-O(4)   | 78.36(16)  |
| O(17)-V(1)-V(6)   | 39.88(11)  | O(6)-V(3)-O(4)    | 144.19(19) |
| O(3)-V(1)-V(6)    | 126.07(12) | O(1)-V(3)-O(4)    | 84.98(17)  |
| O(11)-V(1)-V(6)   | 125.47(13) | O(9)-V(3)-V(4)    | 111.37(16) |
| O(12)-V(1)-V(6)   | 40.80(11)  | O(17)-V(3)-V(4)   | 125.60(13) |
| V(7)-V(1)-V(6)    | 143.38(4)  | O(6)-V(3)-V(4)    | 39.72(12)  |
| O(13)-V(2)-O(12)  | 110.1(2)   | O(1)-V(3)-V(4)    | 40.55(11)  |
| O(13)-V(2)-O(2)   | 106.6(2)   | O(4)-V(3)-V(4)    | 120.91(13) |
| O(12)-V(2)-O(2)   | 92.01(17)  | O(9)-V(3)-V(6)    | 110.07(16) |
| O(13)-V(2)-O(8)   | 108.1(2)   | O(17)-V(3)-V(6)   | 38.40(12)  |
| O(12)-V(2)-O(8)   | 141.67(17) | O(6)-V(3)-V(6)    | 125.74(12) |
| O(2)-V(2)-O(8)    | 80.64(17)  | O(1)-V(3)-V(6)    | 119.25(12) |
| O(13)-V(2)-O(18)  | 105.17(19) | O(4)-V(3)-V(6)    | 40.22(11)  |
| O(17)-V(6)-O(4)   | 79.17(17)  | V(4)-V(3)-V(6)    | 138.49(4)  |
| O(12)-V(6)-O(4)   | 140.18(18) | O(21)-V(4)-O(1)#1 | 107.4(2)   |
| O(7)-V(6)-O(18)   | 109.6(2)   | O(21)-V(4)-O(6)   | 116.7(2)   |

|                     |            |                    |            |
|---------------------|------------|--------------------|------------|
| O(17)-V(6)-O(18)    | 137.95(18) | O(1)#1-V(4)-O(6)   | 135.90(18) |
| O(12)-V(6)-O(18)    | 78.64(16)  | O(21)-V(4)-O(1)    | 104.5(2)   |
| O(4)-V(6)-O(18)     | 93.96(17)  | O(1)#1-V(4)-O(1)   | 89.36(17)  |
| O(7)-V(6)-V(1)      | 113.37(17) | O(6)-V(4)-O(1)     | 80.90(17)  |
| O(17)-V(6)-V(1)     | 39.92(12)  | O(21)-V(4)-O(5)#1  | 109.4(2)   |
| O(12)-V(6)-V(1)     | 41.51(11)  | O(1)#1-V(4)-O(5)#1 | 88.47(17)  |
| O(4)-V(6)-V(1)      | 114.93(12) | O(6)-V(4)-O(5)#1   | 76.68(16)  |
| O(18)-V(6)-V(1)     | 114.97(11) | O(1)-V(4)-O(5)#1   | 145.10(17) |
| O(7)-V(6)-V(3)      | 113.14(17) | O(21)-V(4)-V(4)#1  | 105.73(17) |
| O(17)-V(6)-V(3)     | 38.17(12)  | O(1)#1-V(4)-V(4)#1 | 45.47(12)  |
| O(12)-V(6)-V(3)     | 114.13(12) | O(6)-V(4)-V(4)#1   | 117.93(13) |
| O(4)-V(6)-V(3)      | 41.26(12)  | O(1)-V(4)-V(4)#1   | 44.73(12)  |
| O(18)-V(6)-V(3)     | 125.47(13) | O(5)#1-V(4)-V(4)#1 | 128.80(13) |
| V(1)-V(6)-V(3)      | 76.61(3)   | O(21)-V(4)-V(3)    | 113.43(17) |
| O(7)-V(6)-V(2)      | 115.08(17) | O(1)#1-V(4)-V(3)   | 121.32(12) |
| O(17)-V(6)-V(2)     | 112.20(13) | O(6)-V(4)-V(3)     | 39.88(12)  |
| O(12)-V(6)-V(2)     | 38.14(12)  | O(1)-V(4)-V(3)     | 41.37(12)  |
| O(4)-V(6)-V(2)      | 124.70(14) | O(5)#1-V(4)-V(3)   | 114.06(12) |
| O(18)-V(6)-V(2)     | 40.55(11)  | V(4)#1-V(4)-V(3)   | 83.17(4)   |
| V(1)-V(6)-V(2)      | 77.18(3)   | O(21)-V(4)-V(5)    | 119.70(17) |
| V(3)-V(6)-V(2)      | 131.02(4)  | O(1)#1-V(4)-V(5)   | 117.46(12) |
| O(16)-V(7)-O(3)     | 108.5(2)   | O(6)-V(4)-V(5)     | 36.79(12)  |
| O(16)-V(7)-O(11)    | 113.2(2)   | O(1)-V(4)-V(5)     | 113.79(12) |
| O(3)-V(7)-O(11)     | 81.31(16)  | O(5)#1-V(4)-V(5)   | 39.90(12)  |
| O(16)-V(7)-O(8)#1   | 109.4(2)   | V(4)#1-V(4)-V(5)   | 134.33(2)  |
| O(3)-V(7)-O(8)#1    | 82.32(17)  | V(3)-V(4)-V(5)     | 75.31(3)   |
| O(11)-V(7)-O(8)#1   | 137.28(18) | O(20)-V(5)-O(6)    | 108.7(2)   |
| O(16)-V(7)-O(19)#1  | 108.9(2)   | O(20)-V(5)-O(11)   | 109.3(2)   |
| O(3)-V(7)-O(19)#1   | 142.09(18) | O(6)-V(5)-O(11)    | 91.40(17)  |
| O(11)-V(7)-O(19)#1  | 78.31(16)  | O(20)-V(5)-V(7)    | 111.83(17) |
| O(8)#1-V(7)-O(19)#1 | 91.43(16)  | O(6)-V(5)-V(7)     | 122.56(12) |
| O(16)-V(7)-V(8)#1   | 110.52(17) | O(11)-V(5)-V(7)    | 37.42(12)  |
| O(3)-V(7)-V(8)#1    | 40.31(12)  | O(19)#1-V(5)-V(7)  | 40.40(11)  |
| O(11)-V(7)-V(8)#1   | 115.32(12) | O(5)#1-V(5)-V(7)   | 125.97(13) |
| O(8)#1-V(7)-V(8)#1  | 42.51(12)  | O(20)-V(5)-V(4)    | 112.13(17) |
| O(19)#1-V(7)-V(8)#1 | 127.04(13) | O(6)-V(5)-V(4)     | 36.48(12)  |
| O(16)-V(7)-V(1)     | 114.22(16) | O(11)-V(5)-V(4)    | 121.14(12) |
| O(3)-V(7)-V(1)      | 40.53(12)  | O(19)#1-V(5)-V(4)  | 123.60(13) |
| O(11)-V(7)-V(1)     | 41.05(12)  | O(5)#1-V(5)-V(4)   | 39.86(11)  |

|                    |            |                     |            |
|--------------------|------------|---------------------|------------|
| O(8)#1-V(7)-V(1)   | 115.65(12) | V(7)-V(5)-V(4)      | 135.96(4)  |
| O(19)#1-V(7)-V(1)  | 115.00(12) | O(7)-V(6)-O(17)     | 112.0(2)   |
| V(8)#1-V(7)-V(1)   | 78.32(3)   | O(7)-V(6)-O(12)     | 111.0(2)   |
| O(16)-V(7)-V(5)    | 114.94(17) | O(17)-V(6)-O(12)    | 80.84(16)  |
| O(3)-V(7)-V(5)     | 114.93(12) | O(7)-V(6)-O(4)      | 108.4(2)   |
| O(11)-V(7)-V(5)    | 38.18(12)  | V(7)-O(3)-V(1)      | 99.39(17)  |
| O(8)#1-V(7)-V(5)   | 122.05(12) | Sb(2)-O(4)-V(6)     | 139.6(2)   |
| O(19)#1-V(7)-V(5)  | 40.29(11)  | Sb(2)-O(4)-V(3)     | 121.87(19) |
| V(8)#1-V(7)-V(5)   | 134.03(4)  | V(6)-O(4)-V(3)      | 98.52(17)  |
| V(1)-V(7)-V(5)     | 77.47(3)   | Sb(2)-O(5)-V(4)#1   | 117.3(2)   |
| O(15)-V(8)-O(3)#1  | 113.9(2)   | Sb(2)-O(5)-V(5)#1   | 141.0(2)   |
| O(15)-V(8)-O(2)    | 107.7(2)   | V(4)#1-O(5)-V(5)#1  | 100.24(17) |
| O(3)#1-V(8)-O(2)   | 138.34(17) | V(4)-O(6)-V(3)      | 100.40(19) |
| O(15)-V(8)-O(2)#1  | 105.1(2)   | V(4)-O(6)-V(5)      | 106.74(19) |
| O(3)#1-V(8)-O(2)#1 | 91.96(17)  | V(3)-O(6)-V(5)      | 146.5(2)   |
| O(2)-V(8)-O(2)#1   | 80.16(18)  | V(2)-O(8)-V(7)#1    | 147.7(2)   |
| O(15)-V(8)-O(8)    | 112.2(2)   | V(2)-O(8)-V(8)      | 98.47(17)  |
| O(3)#1-V(8)-O(8)   | 81.69(16)  | V(7)#1-O(8)-V(8)    | 95.68(17)  |
| O(2)-V(8)-O(8)     | 79.95(16)  | Sb(2)-O(10)-Sb(1)   | 131.2(2)   |
| O(2)#1-V(8)-O(8)   | 141.56(17) | V(7)-O(11)-V(1)     | 98.67(18)  |
| O(15)-V(8)-V(7)#1  | 116.24(16) | V(7)-O(11)-V(5)     | 104.40(18) |
| O(3)#1-V(8)-V(7)#1 | 40.36(11)  | V(1)-O(11)-V(5)     | 148.1(2)   |
| O(2)-V(8)-V(7)#1   | 115.94(12) | V(2)-O(12)-V(6)     | 103.44(18) |
| O(2)#1-V(8)-V(7)#1 | 125.72(12) | V(2)-O(12)-V(1)     | 146.4(2)   |
| O(8)-V(8)-V(7)#1   | 41.81(12)  | Sb(1)-O(18)-V(6)    | 136.7(2)   |
| O(15)-V(8)-V(8)#1  | 108.73(16) | Sb(1)-O(18)-V(2)    | 123.5(2)   |
| O(3)#1-V(8)-V(8)#1 | 122.87(12) | V(6)-O(18)-V(2)     | 99.80(18)  |
| O(2)-V(8)-V(8)#1   | 40.17(12)  | Sb(1)-O(19)-V(5)#1  | 141.9(2)   |
| O(2)#1-V(8)-V(8)#1 | 40.16(12)  | Sb(1)-O(19)-V(7)#1  | 118.65(19) |
| O(8)-V(8)-V(8)#1   | 115.10(12) | V(6)-O(17)-V(1)     | 100.20(18) |
| V(7)#1-V(8)-V(8)#1 | 134.69(3)  | V(5)#1-O(19)-V(7)#1 | 99.32(17)  |
| O(15)-V(8)-V(2)    | 115.65(17) | C(11)-N(6)-C(10)    | 112.3(5)   |
| O(3)#1-V(8)-V(2)   | 113.94(12) | C(11)-N(6)-C(8)     | 111.2(5)   |
| O(2)-V(8)-V(2)     | 39.53(12)  | C(10)-N(6)-C(8)     | 111.7(5)   |
| O(2)#1-V(8)-V(2)   | 113.59(13) | C(4)-N(4)-C(2)      | 112.0(6)   |
| O(8)-V(8)-V(2)     | 40.43(12)  | C(4)-N(4)-C(6)      | 112.1(5)   |
| V(7)#1-V(8)-V(2)   | 79.07(3)   | C(2)-N(4)-C(6)      | 112.9(5)   |
| V(8)#1-V(8)-V(2)   | 76.98(4)   | C(4)-N(4)-Zn(1)     | 106.9(4)   |
| V(4)#1-O(1)-V(4)   | 89.80(17)  | C(2)-N(4)-Zn(1)     | 106.1(4)   |

|                     |            |                  |          |
|---------------------|------------|------------------|----------|
| V(4)#1-O(1)-V(3)    | 151.9(2)   | C(6)-N(4)-Zn(1)  | 106.3(4) |
| V(4)-O(1)-V(3)      | 98.08(18)  | C(3)-N(3)-Zn(1)  | 108.9(4) |
| V(2)-O(2)-V(8)      | 100.92(18) | C(5)-N(2)-Zn(1)  | 109.5(4) |
| V(2)-O(2)-V(8)#1    | 145.8(2)   | C(7)-N(5)-Zn(1)  | 117.5(4) |
| V(8)-O(2)-V(8)#1    | 99.67(18)  | C(1)-N(1)-Zn(1)  | 112.7(4) |
| V(8)#1-O(3)-V(7)    | 99.33(18)  | N(6)-C(10)-C(9)  | 111.4(5) |
| V(8)#1-O(3)-V(1)    | 147.9(2)   | N(8)-C(12)-C(11) | 110.9(5) |
| O(20)-V(5)-O(19)#1  | 108.3(2)   | N(6)-C(8)-C(7)   | 113.3(5) |
| O(6)-V(5)-O(19)#1   | 142.98(18) | N(6)-C(11)-C(12) | 108.0(5) |
| O(11)-V(5)-O(19)#1  | 77.67(16)  | N(7)-C(9)-C(10)  | 109.4(5) |
| O(20)-V(5)-O(5)#1   | 106.2(2)   | N(5)-C(7)-C(8)   | 113.3(5) |
| O(6)-V(5)-O(5)#1    | 76.34(16)  | N(2)-C(5)-C(4)   | 108.2(6) |
| O(11)-V(5)-O(5)#1   | 144.41(18) | N(4)-C(6)-C(3)   | 109.4(5) |
| O(19)#1-V(5)-O(5)#1 | 92.15(16)  | N(4)-C(2)-C(1)   | 109.8(6) |
| V(6)-O(12)-V(1)     | 97.68(17)  | N(4)-C(4)-C(5)   | 109.7(5) |
| V(3)-O(17)-V(6)     | 103.43(19) | N(3)-C(3)-C(6)   | 109.4(5) |
| V(3)-O(17)-V(1)     | 148.8(2)   | N(1)-C(1)-C(2)   | 109.9(5) |

Symmetry transformations used to generate equivalent atoms: #1 -x,y,-z+1/2

**Table S3** Bond valence sum data for the V atoms.

| Atom | $\Sigma s$ | Atom | $\Sigma s$ |
|------|------------|------|------------|
| V1   | 4.06       | V5   | 3.96       |
| V2   | 4.04       | V6   | 4.08       |
| V3   | 4.13       | V7   | 3.99       |
| V4   | 4.04       | V8   | 4.03       |

**Table S4** Selected bond lengths (Å) and the angles (°) around the Zn<sup>2+</sup> cation.

| distance / Å        | angle / °                | angle / °                |
|---------------------|--------------------------|--------------------------|
| Zn(1)-N(3) 2.066(6) | N(1)-Zn(1)-N(4) 80.0(2)  | N(2)-Zn(1)-N(1) 125.9(2) |
| Zn(1)-N(2) 2.091(5) | N(2)-Zn(1)-N(5) 99.2(2)  | N(5)-Zn(1)-N(1) 96.8(2)  |
| Zn(1)-N(5) 2.102(5) | N(3)-Zn(1)-N(2) 118.7(2) | N(3)-Zn(1)-N(4) 81.1(2)  |
| Zn(1)-N(1) 2.103(5) | N(3)-Zn(1)-N(5) 102.9(2) | N(2)-Zn(1)-N(4) 80.3(2)  |
| Zn(1)-N(4) 2.269(5) | N(3)-Zn(1)-N(1) 107.2(2) | N(5)-Zn(1)-N(4) 175.6(2) |
